# Supplementary material for: Exploring the potential of CuCoFeTe@CuCoTe yolk-shelled microrods in supercapacitor applications
Source: Royal Society of Chemistry journal article supplement (doi:10.1039/d4nr00076e), 2024-01-01
Supplement: d4nr00076e1.pdf [file d4nr00076e1.pdf]

## Supporting Information

# Exploring the potential of CuCoFeTe@CuCoTe yolk-shelled microrods in supercapacitor applications

Dorsa Dehghanpour Farashah<sup>1</sup>, Maliheh Abdollahi<sup>2‡</sup>, Akbar Mohammadi Zardkhoshou<sup>1\*</sup>, and Saied Saeed Hosseiny Davarani<sup>1\*</sup>

<sup>1</sup>Department of Chemistry, Shahid Beheshti University, G. C., 1983963113, Evin, Tehran, Iran.

<sup>2</sup> Department of Chemistry, University of Isfahan, Isfahan, Iran.

<sup>‡</sup>Current Address: Department of Environmental Microbiology, UFZ-Helmholtz Centre for Environmental Research, Leipzig, Germany.

Corresponding authors: \*Tel: +98 21 22431661; Fax: +98 21 22431661; E-mail: [ss-hosseiny@sbu.ac.ir](mailto:ss-hosseiny@sbu.ac.ir) (S.S.H. Davarani); and [mohammadi.bahadoran@gmail.com](mailto:mohammadi.bahadoran@gmail.com) (A. Mohammadi Zardkhoshou)

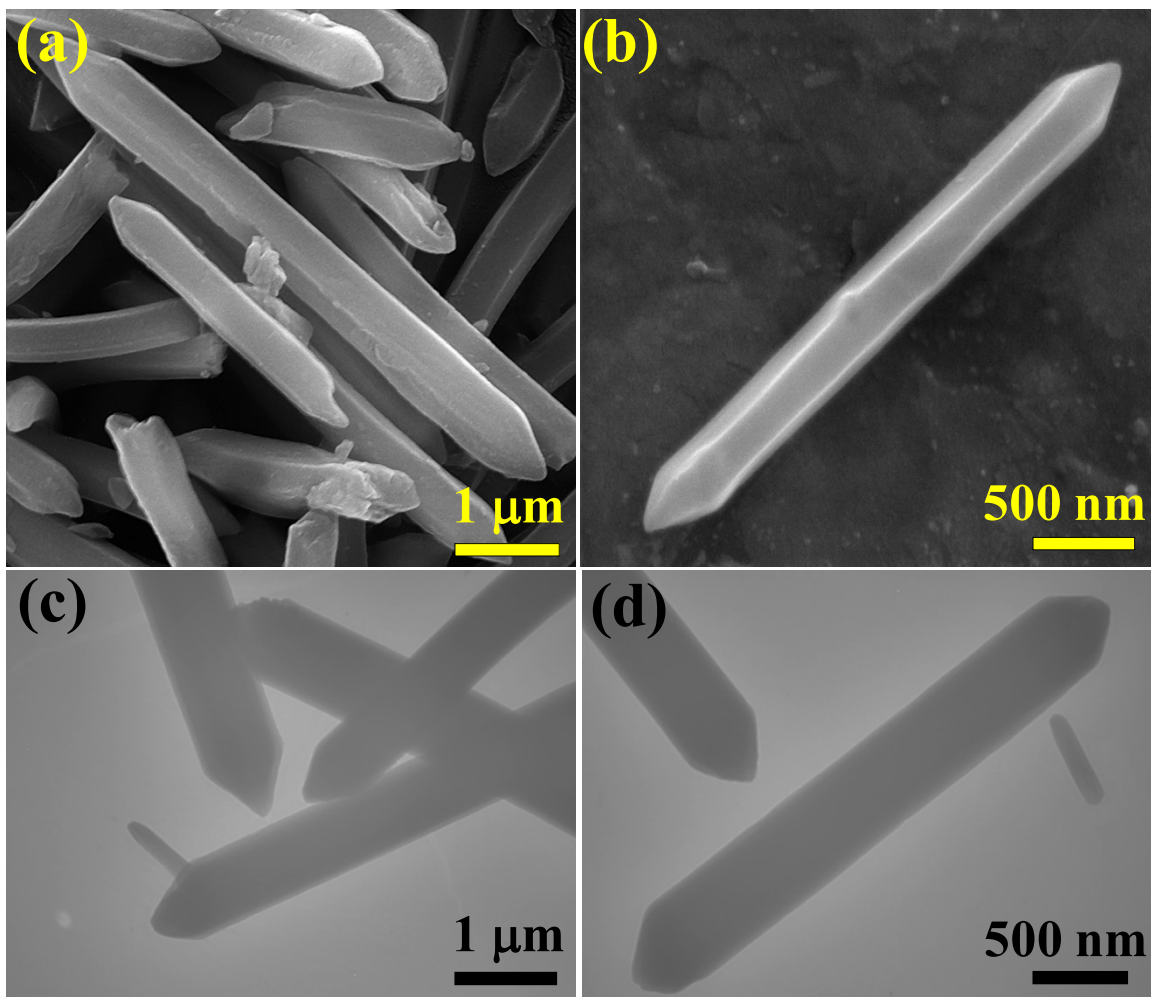

**Fig. S1** (a, b) FESEM images of the MIL-88A. (c, d) TEM images of the MIL-88A.

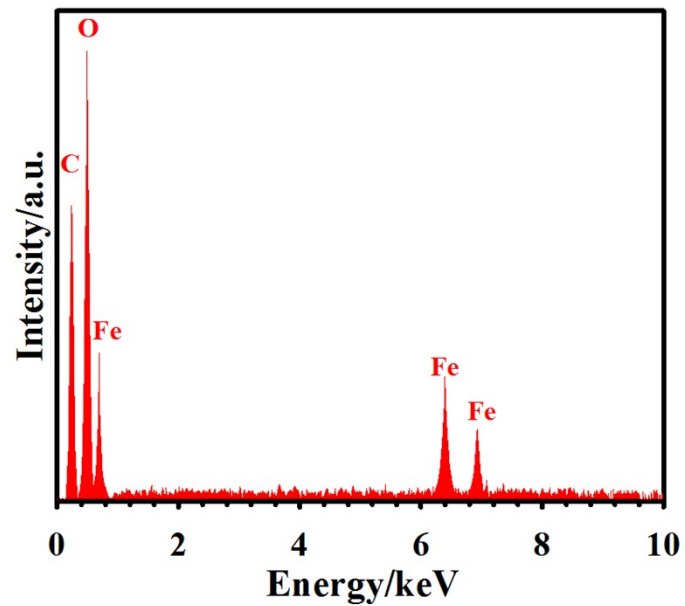

Fig. S2 EDX spectrum of the MIL-88A.

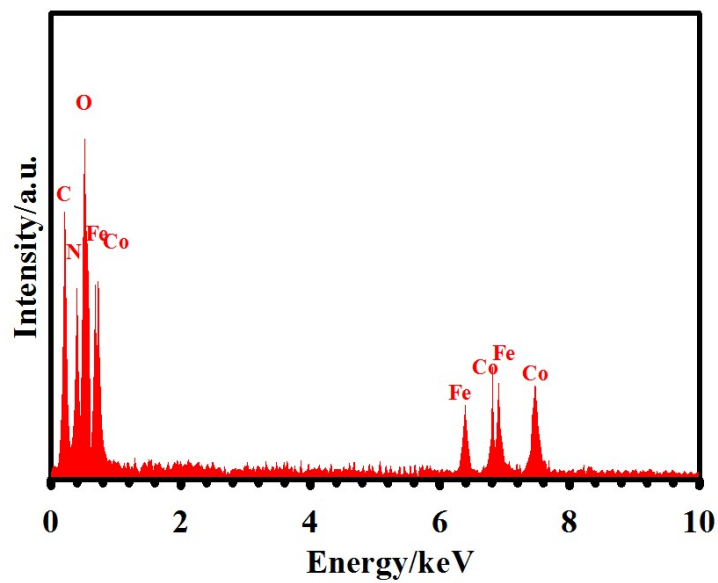

Fig. S3 EDX spectrum of the CFLDH-ZIF67.

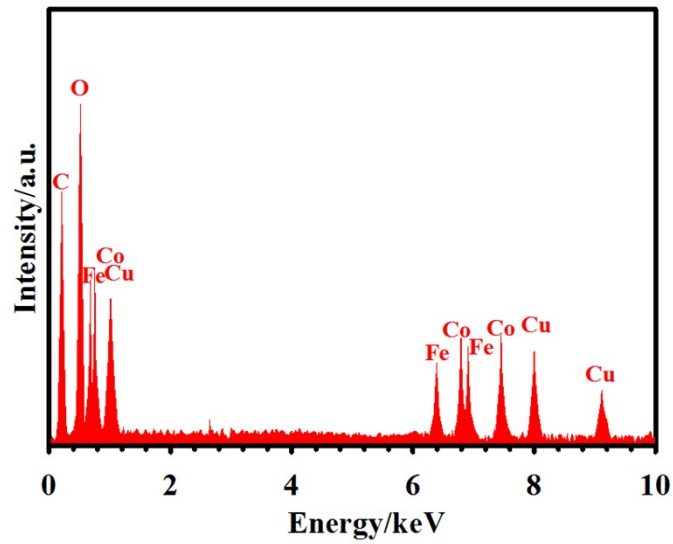

Fig. S4 EDX spectrum of the CCFLDH-CCLDH.

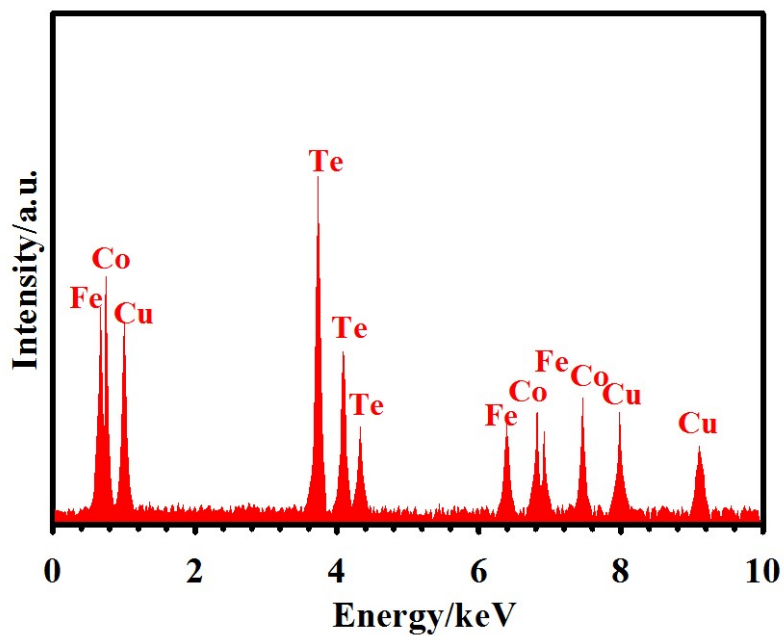

Fig. S5 EDX spectrum of the CCFT-CCT.

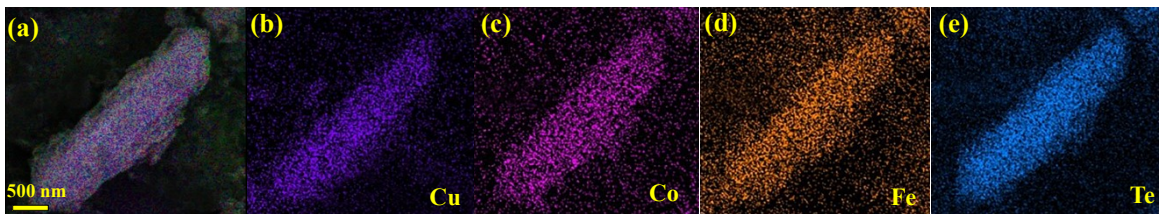

Fig. S6 FESEM mapping images of the CCFT-CCT.

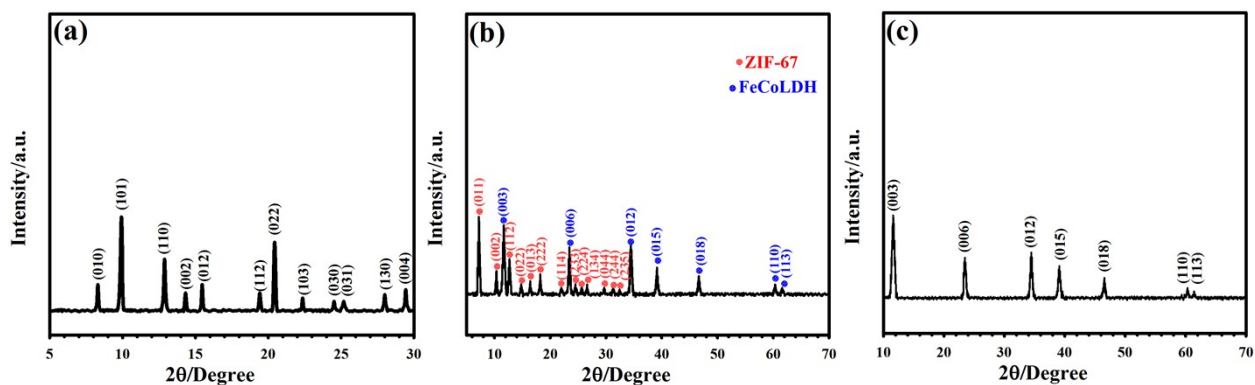

Fig. S7 (a) XRD pattern of the MIL-88A. (b) XRD pattern of the CFLDH-ZIF67. (c) XRD pattern of the CCFLDH-CCLDH.

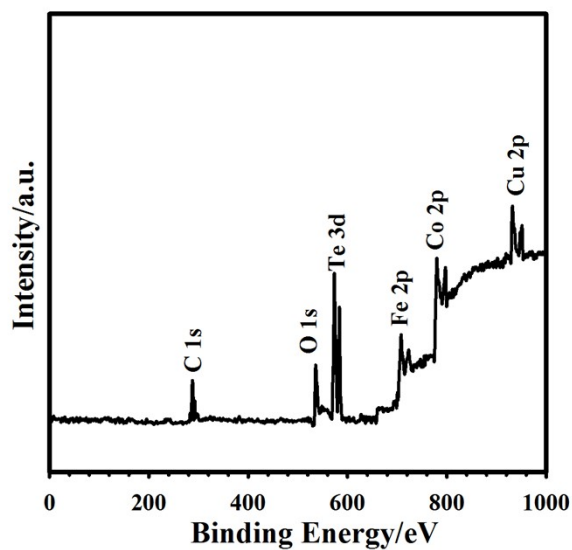

Fig. S8 Survey spectrum of the CCFT-CCT.

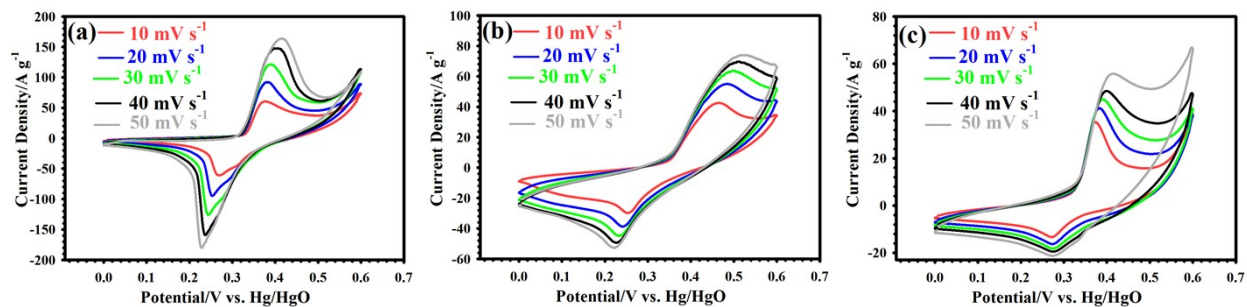

**Fig. S9** (a) CV curves of the CCFLDH-CCLDHYSMR from 10 to 50  $\text{mV s}^{-1}$ . (b) CV curves of the CFLDH-ZIF67 from 10 to 50  $\text{mV s}^{-1}$ . (c) CV curves of the MIL-88A from 10 to 50  $\text{mV s}^{-1}$ .

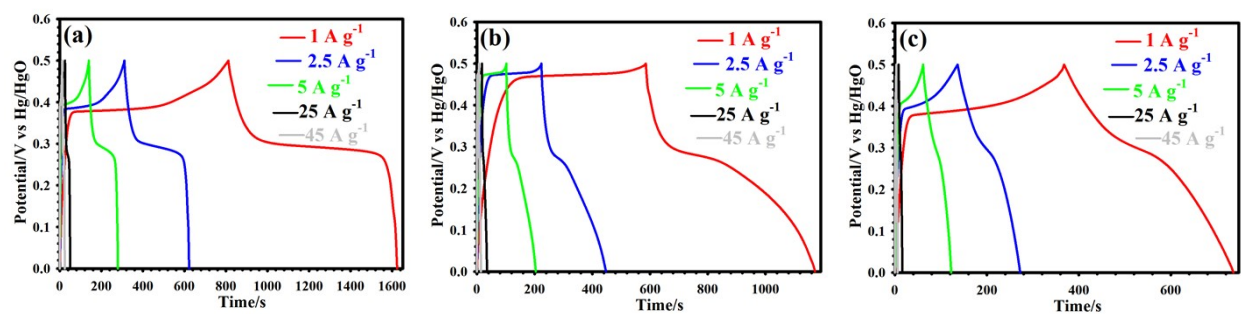

**Fig. S10** (a) GCD curves of the CCFLDH-CCLDHYSMR from 1 to 45  $\text{A g}^{-1}$ . (b) GCD curves of the CFLDH-ZIF67 from 1 to 45  $\text{A g}^{-1}$ . (c) GCD curves of the MIL-88A from 1 to 45  $\text{A g}^{-1}$ .

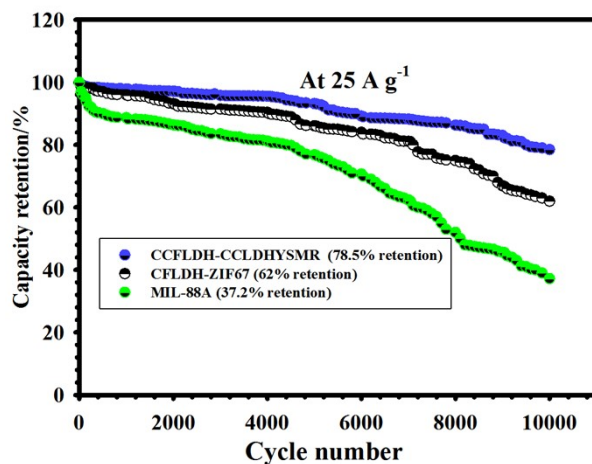

**Fig. S11** Longevity of the MIL-88A, CFLDH-ZIF67, and CCFLDH-CCLDHYSMR electrodes at 25  $\text{A g}^{-1}$ .

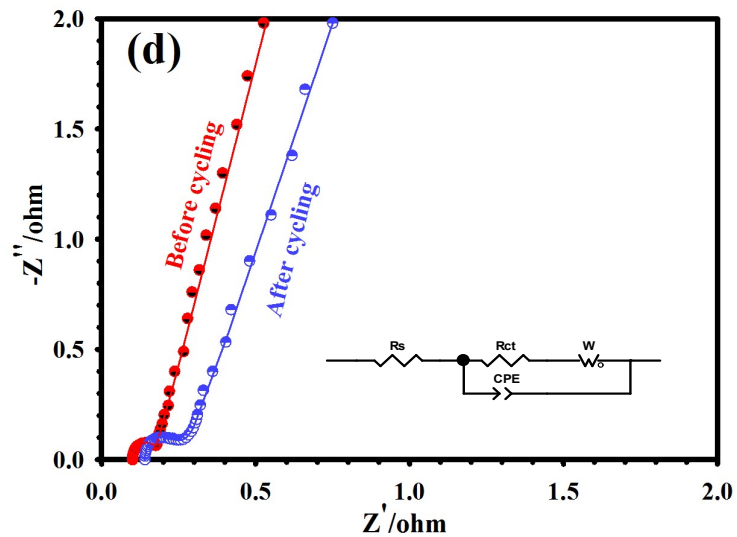

Fig. S12 EIS curves of the CCFT-CCTYSMR before and after 10000 cycles.

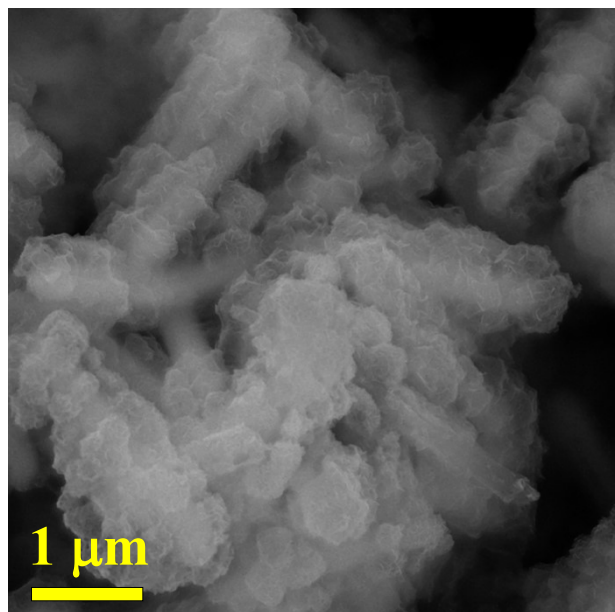

Fig. S13 FESEM image of the CCFT-CCTYSMR after 10000 cycles.

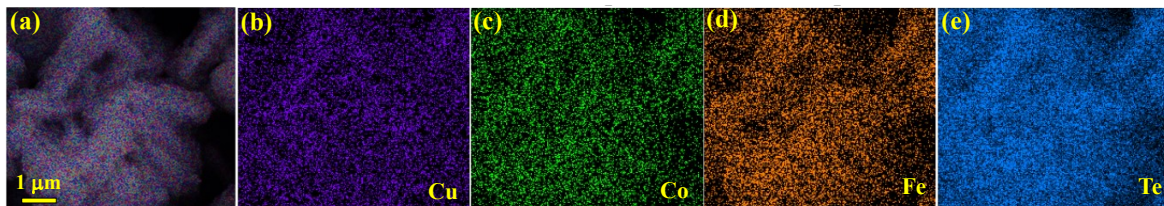

Fig. S14 FESEM mapping images of the CCFT-CCTYSMR after 10000 cycles.

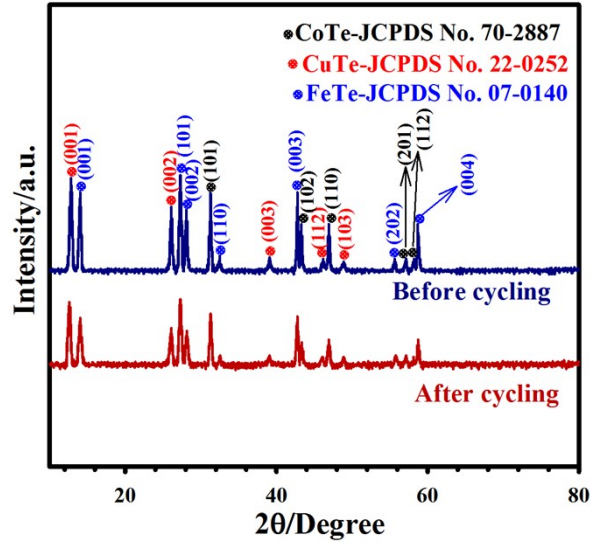

**Fig. S15** XRD pattern of the CCFT-CCTYSMR before and after 10000 GCD cycles.

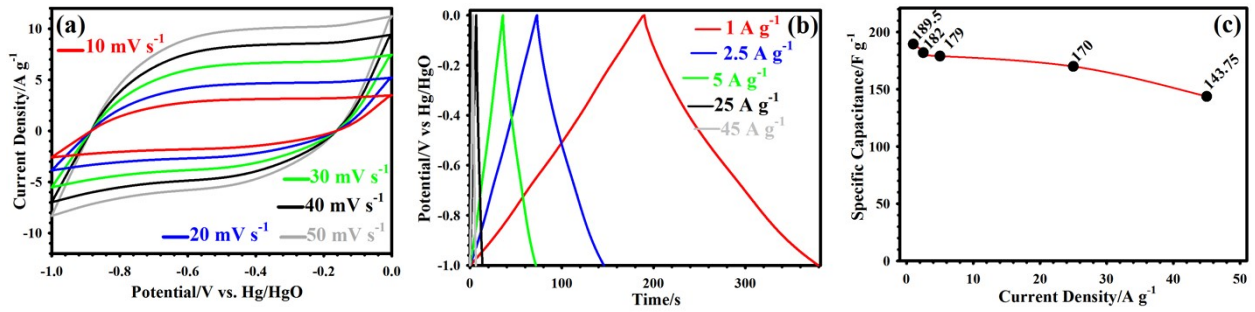

**Fig. S16** (a) CV plots of the AC from 10 to 50  $mV s^{-1}$ . (b) GCD plots of the AC from 1 to 30  $A g^{-1}$ . (c) Rate capability of the AC electrode.



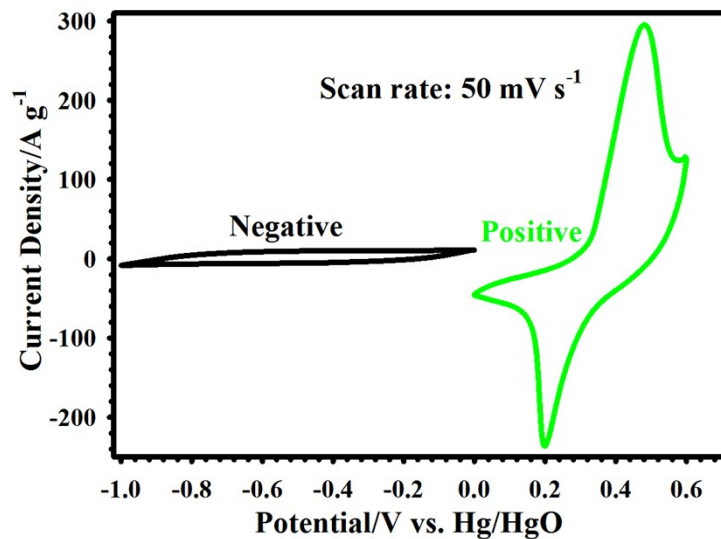

**Fig S. 17** CV plots of AC (negative electrode) and CCFT-CCTYSMR (positive electrode) at  $50 \text{ mV s}^{-1}$  in three-electrode cell.

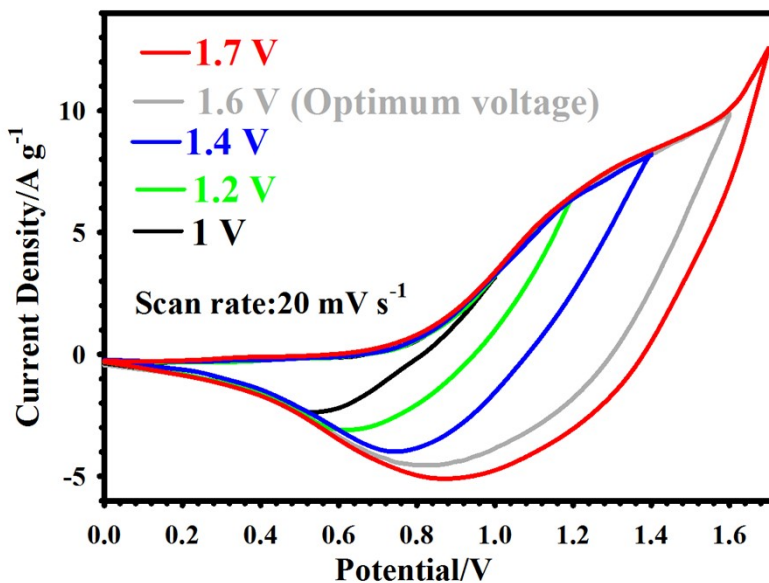

**Fig. S18** CV plots of the AC||CCFT-CCTYSMR at various potential window at  $20 \text{ mV s}^{-1}$  from 1.0 to 1.7 V.

**Table S1.** Comparison of the performance of the CCFT-CCTYSMR with other previously reported

| Composition                               | Capacity (C/g)                | Cycles, retention  | Rate capability                | ED (Wh kg <sup>-1</sup> ) | Reference  |
|-------------------------------------------|-------------------------------|--------------------|--------------------------------|---------------------------|------------|
| MnSe <sub>2</sub> /CoSe <sub>2</sub> -rGO | 1139 at 1 A g <sup>-1</sup>   | 5000, 98.5%        | 80% at 20 A g <sup>-1</sup>    | 45.8                      | 1          |
| CoZnSe@CNTsCN<br>Fs                       | 1040.1 at 1 A g <sup>-1</sup> | 50000, 97.2%       | 52.3% at 30 A g <sup>-1</sup>  | 61.4                      | 2          |
| Ni <sub>0.33</sub> Co <sub>0.67</sub> Te  | 472.3 at 1 A g <sup>-1</sup>  | 5000, 92%          | 60.4% at 20 A g <sup>-1</sup>  | 54                        | 3          |
| rGO-CCSe                                  | 724 at 1 A g <sup>-1</sup>    | 6000, 91.5%        | 71% at 60 A g <sup>-1</sup>    | 57.8                      | 4          |
| CoTe                                      | 354 at 1 A g <sup>-1</sup>    | 5000, 76.9%        | 90.2% at 20 A g <sup>-1</sup>  | 32.9                      | 5          |
| NiSe-Ni <sub>0.85</sub> Se                | 669 at 1 A g <sup>-1</sup>    | 5000, 80%          | 69% at 20 A g <sup>-1</sup>    | 41                        | 6          |
| CuSe@MnSe                                 | 635.32 at 1 A g <sup>-1</sup> | 7000, 91.62%       | 60.3% at 30 A g <sup>-1</sup>  | 19.4                      | 7          |
| CMS-DSHNC                                 | 1029.8 at 1 A g <sup>-1</sup> | 7000, 91.5%        | 76.14% at 50 A g <sup>-1</sup> | 45                        | 8          |
| CCFT-CCTYSMR                              | 1512 at 1 A g <sup>-1</sup>   | 10000, 91.86 (3 E) | 84.45% at 45 A g <sup>-1</sup> | 63.46                     | This study |

electrode materials.

## References

- 1 H. Xuan, G. Zhang, X. Han, R. Wang, X. Liang, Y. Li and P. Han, *J. Alloys Compd.*, 2021, **863**, 158751.
- 2 L.-P. Lv, C. Zhi, Y. Gao, X. Yin, Y. Hu, D. Crespy and Y. Wang, *Nanoscale*, 2019, **11**, 13996-14009.

- 3 S. Zhang, D. Yang, M. Zhang, Y. Liu, T. Xu, J. Yang and Z.-Z. Yu, *Inorg. Chem. Front.*, 2020, **7**, 477–486.
- 4 S. E. Moosavifard, A. Mohammadi, M. Ebrahimnejad Darzi, A. Kariman, M. M. Abdi and G. Karimi, *Chem. Eng. J.*, 2021, **415**, 128662.
- 5 M. Xiao, Y. Su, M. Zhao and B. Du, *Nanotechnology*, 2020, **31**, 55706.
- 6 Y. Bai, W. Shen, K. Song, S. Zhang, Y. Wang, T. Xu, J. Xu, S. Dai and X. Wang, *J. Electroanal. Chem.*, 2021, **880**, 114795.
- 7 G. Tang, X. Zhang, B. Tian, P. Guo, J. Liang and W. Wu, *Chem. Eng. J.*, 2023, **471**, 144590.
- 8 M. Amiri, S. S. Hosseiny Davarani, S. E. Moosavifard and Y.-Q. Fu, *J. Colloid Interface Sci.*, 2022, **616**, 141-151.
